# Supplementary material
Source: publisher site journal article supplement (http://www.spandidos-publications.com/3956/downloadSupplementary)
Supplement: Supplementary file 1 [file downloadSupplementary]

## Sheet: OVC_vs_OV_up_enrichment
Table SIX. KEGG enrichment of upregulated differentially expressed genes between ovarian cancer and healthy ovarian tissue groups.
KEGG ID	P-value	Odds Ratio	Exp. Count	Count	Size	Term
4147	1.51×10^-12	2.3097	52.3048	106	1725	Exosome
4812	0.001316639	1.69111	27.2894	44	900	Cytoskeleton proteins
4218	8.30×10^-07	3.1751	9.30873	27	307	Cellular senescence
5167	2.67×10^-06	3.04153	9.30873	26	307	Kaposi sarcoma-associated herpesvirus infection
4145	1.06×10^-05	2.93613	8.85391	24	292	Phagosome
5205	0.002872436	1.94449	12.917	24	426	Proteoglycans in cancer
5163	0.001358554	2.10566	11.4919	23	379	Human cytomegalovirus infection
5170	0.000543549	2.2675	10.7338	23	354	Human immunodeficiency virus 1 infection
5203	0.001557169	2.08185	11.6132	23	383	Viral carcinogenesis
4670	8.21×10^-07	3.70037	6.57979	22	217	Leukocyte transendothelial migration
4060	0.000107509	2.86824	7.12558	19	235	Cytokine-cytokine receptor interaction
4110	0.000126997	2.82853	7.21654	19	238	Cell cycle
5164	0.000431325	2.54616	7.94426	19	262	Influenza A
4052	9.80×10^-06	3.62684	5.45789	18	180	Cytokines and growth factors
4210	0.001435817	2.41136	7.45912	17	246	Apoptosis
4621	0.006667644	2.04875	8.67198	17	286	NOD-like receptor signaling pathway
5418	0.005060322	2.11238	8.42941	17	278	Fluid shear stress and atherosclerosis
4217	0.005431343	2.1518	7.79265	16	257	Necroptosis
4390	0.006502974	2.10755	7.94426	16	262	Hippo signaling pathway
4668	6.32×10^-05	3.38184	5.15467	16	170	TNF signaling pathway
4933	0.000124451	3.17408	5.45789	16	180	AGE-RAGE signaling pathway in diabetic complications
5120	3.80×10^-06	4.34726	4.12374	16	136	Epithelial cell signaling in Helicobacter pylori infection
5132	8.93×10^-05	3.27469	5.30628	16	175	Salmonella infection
4514	0.000636563	2.81516	5.70046	15	188	Cell adhesion molecules (CAMs)
4068	0.008351019	2.16761	6.76172	14	223	FoxO signaling pathway
4380	0.002347489	2.53463	5.85207	14	193	Osteoclast differentiation
5323	2.45×10^-06	5.17867	3.0928	14	102	Rheumatoid arthritis
4625	0.003120786	2.55098	5.39725	13	178	C-type lectin receptor signaling pathway
5133	5.13×10^-06	5.21783	2.85023	13	94	Pertussis
3051	0.001317493	2.9891	4.30567	12	142	Proteasome
4650	0.005034268	2.50392	5.06371	12	167	Natural killer cell mediated cytotoxicity
5130	0.00045617	3.41129	3.82052	12	126	Pathogenic Escherichia coli infection
5416	8.92×10^-05	4.14115	3.21409	12	106	Viral myocarditis
4620	0.001308765	3.17813	3.72956	11	123	Toll-like receptor signaling pathway
537	0.003803056	2.91078	3.66891	10	121	Glycosylphosphatidylinositol (GPI)-anchored proteins
3050	0.000395671	4.04483	2.72894	10	90	Proteasome
4115	0.001537245	3.33317	3.24441	10	107	p53 signaling pathway
4610	0.000720143	3.71811	2.9412	10	97	Complement and coagulation cascades
5110	0.00202523	3.20054	3.3657	10	111	Vibrio cholerae infection
5131	0.009907793	2.50242	4.2147	10	139	Shigellosis
5140	0.000395671	4.04483	2.72894	10	90	Leishmaniasis
4622	0.005591386	2.93433	3.27473	9	108	RIG-I-like receptor signaling pathway
4974	0.007066439	2.81982	3.39602	9	112	Protein digestion and absorption
5014	0.003147532	3.53619	2.45605	8	81	Amyotrophic lateral sclerosis (ALS)
5216	0.000158505	5.87516	1.57672	8	52	Thyroid cancer
4940	0.003170669	3.95956	1.94058	7	64	Type I diabetes mellitus
4978	0.004838193	3.63935	2.09219	7	69	Mineral absorption
5219	0.008184011	3.26903	2.30444	7	76	Bladder cancer
5332	0.000436544	5.79213	1.39479	7	46	Graft-versus-host disease
5320	0.007424674	3.78835	1.72833	6	57	Autoimmune thyroid disease
5330	0.002534427	4.83273	1.39479	6	46	Allograft rejection
